# Supplementary material
Source: PubMed Central journal article supplement (PMC5523447)
Supplement: NIHMS862265-supplement-Supp.pdf [file NIHMS862265-supplement-Supp.pdf]

## **Occupational Injury Surveillance and Prevention Among Migrant Workers in China: Systematic Review Search Strategies**

Searches were performed to find relevant primary research containing qualitative or quantitative data relating to the surveillance of injury, safety hazards, the causes of injury and injury prevention efforts amongst the population of migrant workers in China known as *nongmingong*. The reference list of systematic reviews and relevant studies found in this search were also utilized. Searches were conducted in medical, social science and academic databases.

All searches were limited to those in English or Chinese published since 2000, where possible.

### **PART 1: Bibliographic Databases**

The following databases were searched with English keywords identified below.

1. PubMed
2. EconLit
3. PyschInfo

4. Web of Science SSCI expanded
5. BIOSIS Preview
6. Journal Citation Reports
7. SafetyLit
8. HMIC
9. CINAHL
10. EPPI-Centre
11. Center for reviews and dissemination database
12. database of abstracts of reviews and effects

The Chinese database identified here was searched with both the English search terms as well as translations identified below.

1. Chinese National Knowledge Infrastructure (CNKI)

### **Search Strategy**

A: Search Strategies for the English-based bibliographic databases will be based on the following combination of text words.

China

AND

(migrant OR migrants OR peasant OR (peasant-workers))

AND

(injury OR safety OR occupational OR work).

B. The following translations of the words identified above were used to search the Chinese database, while the word “China” was not translated or searched in the Chinese databases.

*(nóngmín gōng)*

AND

*(zhíyè shānghài or shānghài or yìwài or ānquán)*

## **PART 2: Additional Searches: Citation and Reference Searching**

The citations for relevant articles identified in this search were reviewed to identify any additional articles missed through these original search terms.

## **PART 3: EXPERT SUGGESTIONS**

Expert commentary and suggestions were invited to modify this search strategy when the paper was reviewed.
