# Supplementary material
Source: PubMed Central journal article supplement (PMC5523447)
Supplement: NIHMS862265-supplement-SuppTable.pdf [file NIHMS862265-supplement-SuppTable.pdf]

**Table 1: Summary of research on occupational injury among migrant workers in China**

| Authors                                                        | Year | Title                                                                                            | Study design             | Study population                                                                                                  | Findings                                                                                                                                                                                                                                                                                                                                                                                                                                                                                   | Risk of Bias and Limitations                                                                                                                         |
|----------------------------------------------------------------|------|--------------------------------------------------------------------------------------------------|--------------------------|-------------------------------------------------------------------------------------------------------------------|--------------------------------------------------------------------------------------------------------------------------------------------------------------------------------------------------------------------------------------------------------------------------------------------------------------------------------------------------------------------------------------------------------------------------------------------------------------------------------------------|------------------------------------------------------------------------------------------------------------------------------------------------------|
| Griggers-Smith E                                               | 2003 | Chinese workers pay personal price for employer noncompliance with labor safety rules            | Key informant interviews | Injured migrants seeking legal redress                                                                            | Interviewees reported 1) beatings from supervisors, 2) pressure to ignore safety precautions because workloads require them to work prohibitively fast, and 3) injuries such as amputations from operating machinery without adequate training.                                                                                                                                                                                                                                            | High risk of selection bias. All interviewed workers are suing employers. No empiric data to support anecdotal evidence.                             |
| Nielsen I, Nyland C, Smyth R, Zhang M, Zhu CJ                  | 2005 | Which Rural Migrants Receive Social Insurance in Chinese Cities?                                 | Key informant interviews | Unspecified number of migrant workers in Shanghai                                                                 | Companies dealing in the most hazardous chemicals specifically hire migrants on short term contracts to handle chemicals. The 20.8% of migrant workers reported an injury during the one year period studied. The highest annual rates of injury by mechanism are: falls (5.5%), being struck by an object (5.5%), and penetrating trauma (4.0%). Laborers and machine operators were most likely to be injured. 20.4% of men (n=571) and 23.3% of women (n=73) reported injuries (p>0.5). | High risk of bias from incomplete outcome data reporting. Data is from previously unpublished, unanalyzed surveys that are only partially presented. |
| Huang ZH, Huang Y, Wang XB, Zhang XT, Yang LS, Hao JH, Huang F | 2007 | Epidemiological investigation on injuries of peasant workers at construction sites in Hefei City | Cross-sectional survey   | 658 migrant workers randomly selected from seven railroad construction sites in Hefei City using cluster sampling |                                                                                                                                                                                                                                                                                                                                                                                                                                                                                            | High risk of selection bias. Cross-sectional survey of previous on-the-job injury. Injured workers who have not returned to work are not sampled.    |

|                                                                    |      |                                                                                                                                              |                               |                                                                                                  |                                                                                                                                                                                                                                                                                                                                                                                                                                            |                                                                                              |
|--------------------------------------------------------------------|------|----------------------------------------------------------------------------------------------------------------------------------------------|-------------------------------|--------------------------------------------------------------------------------------------------|--------------------------------------------------------------------------------------------------------------------------------------------------------------------------------------------------------------------------------------------------------------------------------------------------------------------------------------------------------------------------------------------------------------------------------------------|----------------------------------------------------------------------------------------------|
| Huang F,<br>Yang LS,<br>Wang XB,<br>Wang JF, Ye<br>DQ, Zhang<br>ZH | 2008 | Epidemic<br>Characteristics of<br>Accident Injury<br>among Migrant<br>Rural Workers at<br>Building Site and<br>Preventive<br>Countermeasures | Cross-<br>sectional<br>survey | 881 active<br>migrant rural<br>workers at 12<br>building sites in<br>Hefei region<br>during 2006 | The 17.18% of migrant<br>workers experienced an injury<br>in the previous year, and the<br>incidence rate, counting<br>multiple injuries to one<br>individual as unique, was<br>28.96 injuries per 100 man-<br>years worked. The proportion<br>of injuries by mechanism are<br>the following: falls (21.61%),<br>struck by an object (19.42%),<br>machinery and equipment-<br>related (17.37%), and<br>transportation-related<br>(10.59%). | High risk of selection<br>bias. Cross-sectional<br>survey of previous on-<br>the-job injury. |
|--------------------------------------------------------------------|------|----------------------------------------------------------------------------------------------------------------------------------------------|-------------------------------|--------------------------------------------------------------------------------------------------|--------------------------------------------------------------------------------------------------------------------------------------------------------------------------------------------------------------------------------------------------------------------------------------------------------------------------------------------------------------------------------------------------------------------------------------------|----------------------------------------------------------------------------------------------|

|                                               |      |                                                                                 |                               |                                                                                                                                                                                                                                                              |                                                                                                                                                                                                                                                                                                                                                                                                                                                                                                                                                                                                                                                                                                                                                                                                                                                  |                                                                                                                                                                                                                                                                                                              |
|-----------------------------------------------|------|---------------------------------------------------------------------------------|-------------------------------|--------------------------------------------------------------------------------------------------------------------------------------------------------------------------------------------------------------------------------------------------------------|--------------------------------------------------------------------------------------------------------------------------------------------------------------------------------------------------------------------------------------------------------------------------------------------------------------------------------------------------------------------------------------------------------------------------------------------------------------------------------------------------------------------------------------------------------------------------------------------------------------------------------------------------------------------------------------------------------------------------------------------------------------------------------------------------------------------------------------------------|--------------------------------------------------------------------------------------------------------------------------------------------------------------------------------------------------------------------------------------------------------------------------------------------------------------|
| Xia QH,<br>Jiang Y, Yin<br>N, Hu J, Niu<br>CJ | 2011 | Injury among<br>migrant workers<br>in Changning<br>district,<br>Shanghai, China | Cross-<br>sectional<br>survey | 1256 migrant<br>workers, ages<br>18- 55 (male)<br>and 18-60<br>(female) years<br>old, in<br>Shanghai's<br>Changning<br>District with the<br>following<br>employment:<br>service<br>attendants<br>19.6%, retail<br>13.4%, factory<br>worker 9%,<br>cleaner 9% | The annual injury incidence<br>among the study population<br>was 38.3 injuries per 100<br>workers. The incidence rates<br>by most common mechanism<br>were: penetrating trauma<br>(9.5%), falls (7.2%), traffic<br>injuries (6.3%) and burns<br>(5.5%). Only 39.3% of these<br>injuries occurred at the<br>workplace. Males had a higher<br>injury risk (44.6 v. 31.6%,<br>$p < 0.01$ ). The highest incidence<br>was among electricians (75%),<br>lifeguards (66.7%) and<br>construction workers (58.8%).<br>19.6% of workers reported<br>more than one injury. 417<br>workers needed sick leave,<br>424 needed treatment, and 27<br>hospitalized. 79.8% thought<br>injury prevention services<br>would be helpful. Some<br>interviewed workers said that<br>seriously injured workers often<br>return to their home villages<br>for treatment. | High risks of selection<br>bias. Cross-sectional<br>survey of previous on-<br>the-job injury. Female<br>participants had<br>different age criteria<br>than men.<br>Limitations: the<br>analyses of the causes<br>of migrant injuries mix<br>workplace injuries and<br>injuries occurring<br>outside of work. |
|-----------------------------------------------|------|---------------------------------------------------------------------------------|-------------------------------|--------------------------------------------------------------------------------------------------------------------------------------------------------------------------------------------------------------------------------------------------------------|--------------------------------------------------------------------------------------------------------------------------------------------------------------------------------------------------------------------------------------------------------------------------------------------------------------------------------------------------------------------------------------------------------------------------------------------------------------------------------------------------------------------------------------------------------------------------------------------------------------------------------------------------------------------------------------------------------------------------------------------------------------------------------------------------------------------------------------------------|--------------------------------------------------------------------------------------------------------------------------------------------------------------------------------------------------------------------------------------------------------------------------------------------------------------|

|                                          |      |                                                                                                                    |                        |                                                                                                           |                                                                                                                                                                                                           |                                                                                                                                                                                                                                                                   |
|------------------------------------------|------|--------------------------------------------------------------------------------------------------------------------|------------------------|-----------------------------------------------------------------------------------------------------------|-----------------------------------------------------------------------------------------------------------------------------------------------------------------------------------------------------------|-------------------------------------------------------------------------------------------------------------------------------------------------------------------------------------------------------------------------------------------------------------------|
| Hesketh T,<br>Ye XJ, Li L,<br>Wang HM    | 2008 | Health status and access to health care of migrant workers in China                                                | Cross-sectional survey | 1,958 urban workers, 1,909 rural workers, and 4,452 migrant workers in Hangzhou city in Zhejiang province | While 23% of currently employed migrant workers reported a history an injury at work, compared to 16% of urban workers in the same work units and 10% of the workers still in rural Zhejiang (p<0.0001).  | High risk of selection bias. Cross-sectional survey of previous on-the-job injury. Limitations: Allocation concealment not possible. Injury was not the focus of the research. The sample was not a representative picture of migrant workers in Zhejiang.        |
| Zheng S,<br>Wang Z,<br>Wang H,<br>Song S | 2010 | Do nutrition and health affect migrant workers' incomes? Some evidence from Beijing, China                         | Cross-sectional survey | Interviews of 383 migrant workers in Beijing                                                              | Of the workers interviewed, 40.7% reported a history work place injury, of which only half had been compensated. 34.5% of workers found their excessive workload to be the cause of their own ill health. | High risk of selection bias. Cross-sectional survey of previous on-the-job injury. Limitation: study does not describe the availability of occupational health resources, training or equipment for migrant workers in study. There is no control for comparison. |
| Wu CA,<br>Yang WK,<br>Liu KQ, Liu SX     | 2008 | Investigation on awareness of migrant workers to occupational hazard protection in Bao'an District, Shenzhen City. | Cross-sectional Survey | 8014 migrant workers in Bao'an Shenzhen                                                                   | 33% aware of basic occupational health services. 7.5% aware of occupational health services law. 48% using provided protective equipment. 35% had occupational Safety training.                           | High risk of selection bias. Cross-sectional survey of previous on-the-job injury. Limitation: study does not describe the availability of occupational health resources, training or equipment for migrant workers in study. There is no control for comparison. |

|                                                  |      |                                                                                                                     |                                    |                                                                                                                                            |                                                                                                                                                                                                                                                                                                                                                                                                                                                                                                                             |                                                                                                                                                                                                                       |
|--------------------------------------------------|------|---------------------------------------------------------------------------------------------------------------------|------------------------------------|--------------------------------------------------------------------------------------------------------------------------------------------|-----------------------------------------------------------------------------------------------------------------------------------------------------------------------------------------------------------------------------------------------------------------------------------------------------------------------------------------------------------------------------------------------------------------------------------------------------------------------------------------------------------------------------|-----------------------------------------------------------------------------------------------------------------------------------------------------------------------------------------------------------------------|
| Xia F                                            | 2010 | Analysis of influencing factors on occupational injuries in off-farm workers                                        | Case control study                 | 217 injured migrant workers and 220 uninjured workers in 31 companies in Shanghai                                                          | Multiple variable logistic regression model showed an association of occupational injuries among migrant workers with lower education level (OR=16.67), longer weekly working time (OR=2.12) and less job experience and training (OR=2.12) (P<0.05).                                                                                                                                                                                                                                                                       | Unclear risk of detection bias and unclear risk of bias in case-control design.                                                                                                                                       |
| Xie Y, Tan Y, Tang S                             | 2004 | Epidemiology of 377 patients with chemical burns in Guangdong province                                              | Hospital-based injury surveillance | 377 people admitted for chemical burns to Guangdong Red Cross Hospital from 1987 to 2001 from all across the province                      | Of 244 patients with occupational burn injuries, 95% were "peasant workers" (nongmingong). 46% of burns occurred in autumn and 35% in Winter. 30% of injuries of Shanghai natives occurred at work (697/2321) compared with 59.5% of injuries in non-native Shanghai residents (509/855). The crude prevalence ratio of work-related injury for migrants is 2.0. This ratio is adjusted to 1.6 when controlled for gender and salary. Males have a 1.5 adjusted prevalence ratio for on the job injury compared to females. | Limitations: 1) no data to document the causes of workers' injuries, and 2) no data comparing Guangdong workforce demographics to burn injury demographics.                                                           |
| Perry MJ, Sun BX, Zhang HX, Wang X, Christiani D | 2005 | Emergency Department Surveillance of Occupational Injuries in Shanghai's Putuo District, People's Republic of China | Hospital-based injury surveillance | All injury cases of working age adults presenting to the emergency department from 11/1/1998 to 11/31/1999 at the Putuo District Hospital. |                                                                                                                                                                                                                                                                                                                                                                                                                                                                                                                             | Limitations: The prevalence ratios are not adjusted for age. Unclear what proportion of workers in district are local or migrants. Unclear what proportion of those that live in the district are migrants or locals. |

|                                                                        |      |                                                                                 |                                    |                                                                                                                                 |                                                                                                                                                                                                                                                                                                                            |                                                                                                                                                                                                                                                                                                                                                                                       |
|------------------------------------------------------------------------|------|---------------------------------------------------------------------------------|------------------------------------|---------------------------------------------------------------------------------------------------------------------------------|----------------------------------------------------------------------------------------------------------------------------------------------------------------------------------------------------------------------------------------------------------------------------------------------------------------------------|---------------------------------------------------------------------------------------------------------------------------------------------------------------------------------------------------------------------------------------------------------------------------------------------------------------------------------------------------------------------------------------|
| Disease Prevention and Control Bureau of the Ministry of Public Health | 2007 | Report on Injury Prevention in China                                            | Hospital-based injury surveillance | All traumatic hand injury patients at Tianjin Hospital in 2004                                                                  | For all of 2004, the Tianjin Hospital emergency room saw 8,742 patients, 83.7% of traumatic hand injury patients were rural migrants to the area, of which 90.9% of the injuries happened at work. The urban hospital's traumatic hand injuries show seasonal fluctuations, with peaks during the agricultural off-season. | High risk of bias from incomplete outcome reporting. This is a small excerpt of large government report with no independent evaluation or analysis. Limitation: neither the proportion of migrants in the local workforce nor the proportion of migrants who are patients of other services in the hospital are presented. Note: ' <i>nongmingong</i> ' translated as 'farm workers.' |
| Xia F                                                                  | 2010 | Analysis on causes of farm workers accidents and its prevention countermeasures | Hospital-based surveillance        | All workers presenting with "accidental injuries" to Affiliated Xiehe Hospital of Tongji Medical College from 6/1/2008-6/1/2009 | There were 597 patients with "accidental injuries," including 563 men and 34 women. Migrant workers made up 87.6% of these patients.                                                                                                                                                                                       |                                                                                                                                                                                                                                                                                                                                                                                       |

|       |      |                                                                                             |                             |                                                                                                              |                                                                                                                                                                                                                                                                                                                                                                                                                                                                                                                                                                                                                                                                                                                                                                                                            |                                                                                              |
|-------|------|---------------------------------------------------------------------------------------------|-----------------------------|--------------------------------------------------------------------------------------------------------------|------------------------------------------------------------------------------------------------------------------------------------------------------------------------------------------------------------------------------------------------------------------------------------------------------------------------------------------------------------------------------------------------------------------------------------------------------------------------------------------------------------------------------------------------------------------------------------------------------------------------------------------------------------------------------------------------------------------------------------------------------------------------------------------------------------|----------------------------------------------------------------------------------------------|
| Xia T | 2006 | Preliminary Exploration into Occupational Safety and Health of Migrant Workers in Jiangsu   | Analysis of government data | 252 deaths from occupational injury in mining and construction in Jiangsu province in first 8 months of 2006 | <p>There were 206 fatal workplace incidents in Jiangsu reported during 8 months of survey causing 252 deaths. This includes 52 fatal incidents and 63 deaths in the construction industry. Migrant workers consisted of 80% of the deaths from occupational injuries in all industries, and 90% of the deaths in the construction industry. Migrants made up approximately one third of the Jiangsu workforce in 2005. Migrants workers consist of 32 million of the 38.9 million construction workers in China. According to limited government data, migrant workers suffer 85% of the occupational-injury related mortality among construction workers. Suggestions for improving the situation include improving national occupational injury surveillance and establishing a migrant labor union.</p> | High risk of bias from incomplete reporting of the data. The reported data are approximated. |
| Li SB | 2006 | Analysis of present situation of peasant workers safety production in construction industry | Analysis of government data | 38.9 million Construction workers                                                                            | <p>High risk of incomplete reporting of data. Government data is inadequately cited as from the "relevant government department."</p>                                                                                                                                                                                                                                                                                                                                                                                                                                                                                                                                                                                                                                                                      |                                                                                              |

|                                                  |      |                                                                                                     |                                         |                                                                                                                              |                                                                                                                                                                                              |                                                                                                                  |
|--------------------------------------------------|------|-----------------------------------------------------------------------------------------------------|-----------------------------------------|------------------------------------------------------------------------------------------------------------------------------|----------------------------------------------------------------------------------------------------------------------------------------------------------------------------------------------|------------------------------------------------------------------------------------------------------------------|
| Ministry of Health of China                      | 2010 | Ministry of Health<br>Communiqué:<br>The Situation of Occupational Disease Prevention Work in 2009. | Description of unevaluated intervention | Government report on Ministry of Health efforts targeting migrant workers                                                    | Pilot projects to increase availability of basic occupational health and safety services have been established in 65 counties, 20 of these designed particularly to address migrant workers. | Limitation: no reported data from interventions.                                                                 |
| Chen Y, Chen J, Sun Y, Liu Y, Wu L, Wang Y, Yu S | 2010 | Basic Occupational Health Services in Baoan, China                                                  | Evaluated Intervention                  | 30 workers and one manager in each of 150 randomly selected factories surveyed before and after intervention was implemented | Occupational health surveillance improved after a targeted intervention by local authorities, from covering only a little over 12% of migrant workers in 2001 to close to 80% in 2008.       | High risk of observation bias. There is no control to compare with intervention. Unclear risk of selection bias. |



|                                                                             |      |                                                                                                                |                           |                                                                                                                                                                                                                                                                                                                         |                                                                                                                                                                                                                                                                                                                                                                                                      |                                                                                                                                                                                                                                                                                                                                                                                                                                                                                                                                                                                                          |
|-----------------------------------------------------------------------------|------|----------------------------------------------------------------------------------------------------------------|---------------------------|-------------------------------------------------------------------------------------------------------------------------------------------------------------------------------------------------------------------------------------------------------------------------------------------------------------------------|------------------------------------------------------------------------------------------------------------------------------------------------------------------------------------------------------------------------------------------------------------------------------------------------------------------------------------------------------------------------------------------------------|----------------------------------------------------------------------------------------------------------------------------------------------------------------------------------------------------------------------------------------------------------------------------------------------------------------------------------------------------------------------------------------------------------------------------------------------------------------------------------------------------------------------------------------------------------------------------------------------------------|
| Szudy,<br>B.O'Rourke,<br>D.Brown, G.<br>D.                                  | 2003 | Developing an<br>action-based<br>health and safety<br>training project<br>in Southern<br>China                 | Evaluated<br>Intervention | 90 participants of<br>the course<br>including 15<br>workers and five<br>supervisors from<br>each of the three<br>footwear<br>factories, 22<br>representatives<br>from four Hong<br>Kong-based<br>nongovernmental<br>organizations,<br>and eight labor<br>practices staff<br>members from<br>Adidas, Nike,<br>and Reebok | Workers reported improved<br>safety knowledge (from 25-<br>75%). 90% of workers<br>participated in the health and<br>safety committees the<br>intervention created, but fewer<br>than 10% reported that a<br>committee took any action to<br>resolve a health or safety<br>issue. They noted resistance<br>from supervisors and inability<br>to implement suggested safety<br>improvements.          | High risk of<br>observation bias.<br>There is no control to<br>compare with<br>intervention.<br>Limitation: study did<br>not evaluate as<br>outcomes such as<br>incidence of injury, or<br>objective measures of<br>workers' health and<br>safety knowledge.<br>High risk of selection<br>bias. Paper is not a<br>systematic review of<br>literature.<br>Limitation: Migration<br>data of TVE workers<br>presented in this<br>review was not from<br>the same studies or<br>same workplaces as<br>the research showing<br>disproportionate<br>occupational injury-<br>related mortality in<br>TVE mines. |
| Wang X,<br>Wu S, Song<br>Q,<br>Tse LA, Yu<br>IT, Wong<br>TW, Griffiths<br>S | 2011 | Occupational<br>health and safety<br>challenges in<br>China-focusing<br>on township-<br>village<br>enterprises | Literature<br>Review      | Businesses<br>owned by local<br>governments<br>called Township<br>Village<br>Enterprises<br>(TVE)                                                                                                                                                                                                                       | Surveys of two TVE in Shanxi<br>found 50% of the workers<br>were migrants. Nationwide<br>surveys of TVE in 1990 and in<br>2000 found less than 2% of<br>workplaces had preventive<br>safety inspections, and less<br>than 4% had any workplace<br>hazard monitoring. TVE mines<br>had a reported death rate<br>between 7 and 8 times higher<br>than that for larger state<br>mines from 1992 to 2003 |                                                                                                                                                                                                                                                                                                                                                                                                                                                                                                                                                                                                          |
